# Supplementary material for: Emerging roles of the RNA modifications N6-methyladenosine and adenosine-to-inosine in cardiovascular diseases
Source: PubMed Central journal article supplement (PMC9366019; doi:10.1016/j.omtn.2022.07.018), 2022-07-20
Supplement: mmc1.pdf [file mmc1.pdf]

**OMTN, Volume 29**

**Supplemental information**

**Emerging roles of the RNA  
modifications N6-methyladenosine and  
adenosine-to-inosine in cardiovascular diseases**

**Vilbert Sikorski, Antti Vento, Esko Kankuri, and on behalf of the IHD-EPITRAN Consortium**

**TABLE S1. Summary of observational study results assessing m<sup>6</sup>A and its core regulators in cardiovascular physiology and diseases**

Rough methodological classification: \*\*\*, interventional study with experimental evidence either *in vivo*, with multiple lines *in vitro*, or both; \*, mainly observational study with direct samples from the target tissue or organ, possibly few interventional methods *in vitro*; o, associative/phenotypic study with indirect samples (such as blood), no interventional methods. The degree of certainty for summarized potential therapeutic effect is divided here to be either high (experimental evidence *in vivo*), intermediate<sup>†</sup> (experimental evidence *in vitro*), or light<sup>††</sup> (associative/phenotype evidence). To review the Table S1, please see the Supplementary excel file. Abbreviations are listed within the Supplementary excel as well.

**TABLE S2. Summary of observational and interventional discoveries regarding A-to-I editing in cardiovascular physiology and diseases**

Methodological classification: \*\*\*, interventional study with experimental evidence either *in vivo*, with multiple lines *in vitro* or both; \*, mainly observational study with direct samples from the target tissue or organ, possibly few interventional methods *in vitro*; o, associative/phenotypic study with indirect samples (such as blood), no interventional methods. The degree of certainty for summarized potential therapeutic effect is divided here to be either high (experimental evidence *in vivo*), intermediate<sup>†</sup> (experimental evidence *in vitro*), or light<sup>††</sup> (associative/phenotype evidence). Blue arrows indicate either overexpression or knockdown. To review the Table S2, please see the Supplementary excel file. Abbreviations are listed within the Supplementary excel as well.

**TABLE S3. Summary of studies assessing the effects of m<sup>6</sup>A manipulation in cardiovascular pathologies or related bioprocesses.** While upwards arrow indicates upregulation or increase in the given process in general, downwards arrow indicates downregulation or decrease. To review the Table S3, please see the Supplementary excel file. Abbreviations are listed within the Supplementary excel as well.

**TABLE S4. Summary of molecular pathways involving m<sup>6</sup>A and A-to-I modifications in CVDs.** Upwards and downwards arrows indicate upregulation (activation) or downregulation (inhibition), respectively. Blunt arrows represent inhibition.

Abbreviations: *ADAR1*, adenosine deaminase RNA specific; *ADAR2*, adenosine deaminase RNA specific B1; *AGO2*, argonaute RISC catalytic component 2; *AKT*, AKT serine/threonine kinase; *ALKBH5*, alkB homolog 5, RNA demethylase; *AngII*, angiotensin II; *ANK2*, ankyrin 2; *ATF4*, activating transcription factor 4; *AUF1*, ARE/poly(U)-binding/degradation factor 1, alias *HNRNPD*, heterogeneous nuclear ribonucleoprotein D; *AVC*, aortic valve calcification; *BCL2*, BCL2 apoptosis regulator; *CCL2*, C-C motif chemokine ligand 2; *CDC42*, cell division cycle 42; *CDRIas*, cdr1 antisense (a long non-coding RNA); *CHAPIR*, Cardiac-hypertrophy-associated piRNA (piwi-interacting RNA); *Chast*, cardiac hypertrophy-associated transcript (a long non-coding RNA); *CHOP*, C/EBP homologous protein; *circCELF1*, circular RNA CUGBP Elav-like family member 1; *CM*, cardiomyocyte; *CMYA5*, cardiomyopathy associated 5; *CPT-1A*, carnitine palmitoyltransferase 1A; *CTNND1*, catenin delta 1; *CTSL*, cathepsin L; *CTSS*, cathepsin S; *CUX1p110*, cut like homeobox 1, isoform p110; *CXCL8*, C-X-C motif chemokine ligand 8; *DCM*, dilated cardiomyopathy; *DDX6*, DEAD-box helicase 6; *DGCR8*, DGCR8 microprocessor complex subunit; *DHCR24*, 24-dehydrocholesterol reductase; *DKK2*, dickkopf WNT signaling pathway inhibitor 2; *DSP*, desmoplakin; *DTX1*, deltex E3 ubiquitin ligase 1; *DTX3L*, deltex E3 ubiquitin ligase 3L; *EGFR*, epidermal growth factor receptor; *EIF3A*, eukaryotic translation initiation factor 3 subunit A; *eNOS*, endothelial nitric oxide synthase; *ER*, endoplasmic reticulum; *ET*, electron transport; *EV*, extracellular vesicle; *FAK*, focal adhesion kinase; *FBXO32*, F-box protein 32; *FOXO1/-3*, forkhead box O1/-3; *FTO*, FTO alpha-ketoglutarate dependent dioxygenase; *GLUT4*, insulin-responsive glucose transporter type 4; *GPX4*, glutathione peroxidase 4; *GSK3β*, glycogen synthase kinase 3 β; *HFpEF*, heart failure with preserved ejection fraction; *HFrEF*, heart failure with reduced ejection fraction; *H3K4me3*, tri-methylation at the 4th lysine residue of the histone H3 protein; *HNRNPA2B1*, heterogeneous nuclear ribonucleoprotein A2/B1; *H/R*, hypoxia-reoxygenation (injury); *HuR*, human antigen R; *ICAM-1*, intercellular adhesion molecule 1; *IGF2BP1/-2/-3*, insulin-like growth factor 2 mRNA binding protein 1/2/3; *INF-γ*, interferon γ; *IL-6*, interleukin 6; *I/R*, ischemia-reperfusion (injury); *JAK2*, Janus kinase 2; *KDM5A*, lysine demethylase 5A; *KIAA1429*, alias *VIRMA*, vir-like m<sup>6</sup>A methyltransferase associated; *KLF4/-5*, krüppel-like factor 4/-5; *LATS1/-2*, Large tumor suppressor kinase 1/-2; *L-PGDS*, prostaglandin D synthase; *LPS*, lipopolysaccharide; *MAGED1*, MAGE family member D1; *MAVS*, mitochondrial antiviral-signaling protein; *MDA5*, melanoma differentiation-associated protein 5; *METTL3*, methyltransferase 3, N<sup>6</sup>-adenosine-methyltransferase complex catalytic subunit; *METTL14*, methyltransferase 14, N<sup>6</sup>-adenosine-methyltransferase subunit; *METTL16*, methyltransferase 16, N<sup>6</sup>-methyladenosine; *Mhrt*, myosin heavy chain associated RNA transcript (a long non-coding RNA); *MIAT*, myocardial infarction associated transcript (a long non-coding RNA); *MST1*, macrophage stimulating 1; *MYH7/-9*, myosin heavy chain 7/-9; *NACAD*, NAC alpha domain containing; *NEAT1*, nuclear paraspeckle assembly transcript 1 (a long non-coding RNA); *NFATC4*, nuclear factor of activated T cells 4; *NF-κB*, nuclear factor kappa B; *NLRP1/-3*, NLR family pyrin domain containing 1/-3; *NPPA*, natriuretic peptide A; *PARP*, Poly-(ADP-ribose) polymerase; *PM*, pulmonary hypertension; *PMD*, pulmonary microvascular dysfunction; *RYR2*, ryanodine receptor 2; *SERCA2A*, sarcoplasmic/endoplasmic reticulum Ca<sup>2+</sup>ATPase 2a; *SLC7A5*, solute carrier family 7 member 5; *SLC16A3*, solute carrier family 16 member 3; *STAT3*, signal transducer and activator of transcription 3; *PARP10*, poly(ADP-ribose) polymerase family member 10; *PCNA*, proliferating cell nuclear antigen; *PFKFB2*, 6-phosphofructo-2-kinase/fructose-2,6-biphosphatase 2; *PGAM2*, phosphoglycerate mutase 2; *PGD2*, prostaglandin D2; *PIWIL4*, piwi-like RNA-mediated gene silencing 4; *PM2.5*, fine particulate matter, diameter <2.5 μm; *PRKCE*, protein kinase C epsilon type; *p300*, E1A binding protein p300; *SIRT1*, sirtuin 1; *SPHK1*, sphingosine kinase 1; *SULF2*, sulfatase 2; *TanIIA*, Tanshinone IIA, *TCA*, tricarboxylic acid (cycle); *TGF-β1*, transforming growth factor β1; *TFEB*, transcription factor EB; *TINCR*, terminal differentiation-induced non-coding RNA (a long non-coding RNA); *TNF-α*, Tumor necrosis factor α; *TSPI*, thrombospondin-1; *TWIST1*, twist family bHLH transcription factor 1; *VCAM-1*, vascular cell adhesion molecule 1; *WNT1*, wnt family member 1; *WNT5A*, Wnt family member 5A; *WTAP*, WT1 associated protein; *YAPI*, Yes1 associated transcriptional regulator; *YTHDC1*, YTH domain containing 1; *YTHDF1/-2*, YTH N<sup>6</sup>-methyladenosine RNA binding protein 1/-2.

**Table S4** Select summary of identified molecular pathways regarding **m<sup>6</sup>A** and **A-to-I** RNA modifications and their key regulators in CVDs

| Class                     | Process                          | Pathway / molecular associations                                                      |                                                                                                                                         |                                                             | Reference                          |
|---------------------------|----------------------------------|---------------------------------------------------------------------------------------|-----------------------------------------------------------------------------------------------------------------------------------------|-------------------------------------------------------------|------------------------------------|
|                           |                                  | Upstream m <sup>6</sup> A or A-to-I regulators                                        | Inter-stream (e.g. target RNA and reader complex)                                                                                       | Downstream RNAs / proteins                                  |                                    |
| CARDIAC                   | Cardiogenesis ↑                  | ADAR1p150                                                                             |                                                                                                                                         | → MDA5 → MVAS → INF → ER stress                             | 130,172-174                        |
|                           | Regeneration, CM proliferation ↑ | ALKBH5 → <i>YTHDF1</i> → YTHDF1                                                       | → (m <sup>6</sup> A- <i>YAP1</i> / YTHDF1)                                                                                              | → YAP1                                                      | Han et al. <sup>54</sup>           |
|                           |                                  | FTO                                                                                   | → (m <sup>6</sup> A- <i>Cdc42</i> / miR-133a / IGF2BP2 / AGO2)                                                                          | → CDC42                                                     | Qian et al. <sup>124</sup>         |
|                           |                                  | METTL3                                                                                | → (pri-miR-17-3p / DGCR8)                                                                                                               | → miR-17-3p                                                 | Zhao et al. <sup>147</sup>         |
|                           |                                  | ADAR2                                                                                 | → edited-pri-miR-43a → miR-43a                                                                                                          | → SIRT1, Cyclin D1, BCL2                                    | Wu et al. <sup>146</sup>           |
|                           |                                  | METTL3                                                                                | → (m <sup>6</sup> A-pri-miR-143 / DGCR8) → miR-143-3p → <i>Yap1</i> / <i>Ctnnd1</i>                                                     | → YAP1 / CTNND1                                             | Gong et al. <sup>140</sup>         |
|                           | ↕                                | METTL3                                                                                | → <i>Dhcr24</i> , <i>Nacad</i> , <i>Slc16a3</i> , <i>Slc7a5</i>                                                                         |                                                             | Yang et al. <sup>55</sup>          |
|                           | ↔                                | METTL3                                                                                | → <i>Ank2</i> , <i>Cmya5</i> , <i>Fbxo32</i> , <i>Pfkfb2</i>                                                                            |                                                             |                                    |
|                           | Cardiogenesis ↔                  | ADAR2                                                                                 | → let-7 miRNA family / miR-29b                                                                                                          |                                                             | Altaf et al. <sup>132</sup>        |
|                           | Hypertrophy ↑                    | (CHAPIR / PIWIL4) → METTL3                                                            | → (m <sup>6</sup> A- <i>Parp10</i> / YTHDF2)                                                                                            | → PARP10 → GSK3β → NFATC4                                   | Gao et al. <sup>123</sup>          |
|                           |                                  | MIAT → <i>Ythdf2</i> → YTHDF2                                                         | → (m <sup>6</sup> A- <i>Cpt-1a</i> / YTHDF2)                                                                                            | → CPT-1A                                                    | Yang et al. <sup>129</sup>         |
|                           |                                  | USP12 → p300                                                                          | → <i>Mettl3</i>                                                                                                                         | → METTL3                                                    | Lu et al. <sup>126</sup>           |
|                           |                                  | Leptin                                                                                | → p-JAK2 → p-STAT3 → CTSL → CUX1 p110                                                                                                   | → FTO                                                       | Gan et al. <sup>118</sup>          |
|                           |                                  | FTO                                                                                   | → (miR-133a / IGF2BP2 / AGO2)                                                                                                           |                                                             | Qian et al. <sup>124</sup>         |
|                           |                                  | Maslinic acid                                                                         | → <i>Mettl3</i>                                                                                                                         | → METTL3                                                    | Fang et al. <sup>128</sup>         |
|                           | ↓                                | Tanshinone IIA → <i>Alkbh5</i> → ALKBH5                                               | → m <sup>6</sup> A- <i>Galectin-3</i>                                                                                                   | → Galectin-3                                                | Zhang et al. <sup>141</sup>        |
|                           | Myocardial infarction ↑          | KDM5A → H3K4me3 → METTL3                                                              | → (m <sup>6</sup> A-pri-miR-503 / HNRNPA2B1) → EV-packed miR-503                                                                        | → PGC-1β, SIRT1 → ET chain, TCA cycle                       | Sun et al. <sup>148</sup>          |
|                           |                                  | FTO                                                                                   | → m <sup>6</sup> A-( <i>Nppa</i> , <i>Myh7</i> , <i>Serca2a</i> , <i>Myh9</i> , <i>Ryr2</i> , <i>Ttn</i> , <i>Chast</i> , <i>Mhrt</i> ) | → SERCA2A                                                   | Mathiyalagan et al. <sup>107</sup> |
|                           | I/R, H/R injury ↑                | WTAP                                                                                  | → m <sup>6</sup> A- <i>ATF4</i>                                                                                                         | → ATF4 → WTAP                                               | Wang et al. <sup>136</sup>         |
|                           |                                  | METTL3                                                                                | → (m <sup>6</sup> A- <i>Tfeb</i> / HNRNPD)                                                                                              | → TFEB → <i>Alkbh5</i> → ALKBH5<br>→ <i>Mettl3</i> → METTL3 | Song et al. <sup>134</sup>         |
| METTL3                    |                                  | → (m <sup>6</sup> A-pri-miR-143-3p / DGCR8) → miR-143-3p                              | → PRKCE                                                                                                                                 | Wang et al. <sup>142</sup>                                  |                                    |
| METTL14                   |                                  | → m <sup>6</sup> A- <i>Wnt1</i>                                                       | → WNT1 → β-catenin                                                                                                                      | Pang et al. <sup>143</sup>                                  |                                    |
| FTO                       |                                  | → m <sup>6</sup> A- <i>Mhrt</i> (lncRNA)                                              | → <i>Mhrt</i> (lncRNA)                                                                                                                  | Shen et al. <sup>135</sup>                                  |                                    |
| FTO                       |                                  | → m <sup>6</sup> A- <i>Yap1</i>                                                       | → YAP1                                                                                                                                  | Ke et al. <sup>145</sup>                                    |                                    |
| Cardiac fibrosis ↑        | AngII → circCELF1                | → FTO → (m <sup>6</sup> A- <i>Dkk2</i> / miR-363)                                     | → DKK2                                                                                                                                  | Li et al. <sup>149</sup>                                    |                                    |
| HFpEF (↓)                 | FTO                              | → m <sup>6</sup> A- <i>Pgam2</i>                                                      | → PGAM2                                                                                                                                 | Zhang et al. <sup>175</sup>                                 |                                    |
|                           |                                  | → p-AKT → <i>Glut4</i>                                                                | → GLUT4                                                                                                                                 |                                                             |                                    |
| HFrEF ↔                   | FTO                              | → m <sup>6</sup> A- <i>Mhrt</i> (lncRNA)                                              | → <i>Mhrt</i> (lncRNA)                                                                                                                  | Shen et al. <sup>135</sup>                                  |                                    |
| DCM ↓                     |                                  | (m <sup>6</sup> A- <i>Titin</i> / YTHDC1) → (alternative splicing) → <i>N2B-Titin</i> | → N2B-Titin                                                                                                                             | Gao et al. <sup>150</sup>                                   |                                    |
| Diabetic cardiomyopathy ↑ | ALKBH5                           | → (m <sup>6</sup> A- <i>Foxo3</i> / YTHDF2) → FOXO3                                   | → <i>CDR1as</i> (lncRNA) → MST1 → LATS1/2 → YAP1                                                                                        | Shao et al. <sup>153</sup>                                  |                                    |
|                           | METTL14                          | → (m <sup>6</sup> A- <i>TINCR</i> / YTHDF2) → <i>TINCR</i> (lncRNA)                   | → <i>Nlrp3</i> → NLRP3                                                                                                                  | Meng et al. <sup>152</sup>                                  |                                    |
| AVC ↑                     | METTL3                           | → (m <sup>6</sup> A- <i>TWIST1</i> / YTHDF2)                                          | → TWIST1                                                                                                                                | Zhou et al. <sup>157</sup>                                  |                                    |
| CM inflammation ↑         | Palmitic acid                    | → CD36 [→ ( <i>Cd36</i> -m <sup>6</sup> A) → FTO]                                     | → TNF-α, IL-6, p-P65                                                                                                                    | Yu et al. <sup>154</sup>                                    |                                    |

Cont'd

Cont'd Table S4

| Class                  | Process                          | Pathway / molecular associations               |                                                   |                                                | Reference                                   |                                        |
|------------------------|----------------------------------|------------------------------------------------|---------------------------------------------------|------------------------------------------------|---------------------------------------------|----------------------------------------|
|                        |                                  | Upstream m <sup>6</sup> A or A-to-I regulators | Inter-stream (e.g. target RNA and reader complex) | Downstream RNAs / proteins                     |                                             |                                        |
| VASCULAR               | Atherosclerosis, endotheliopathy | ↑                                              | TNFα → METTL14                                    | → (m <sup>6</sup> A-FOXO1 / YTHDF1)            | → FOXO1 → VCAM-1, ICAM-1                    | Jian et al. <sup>90</sup>              |
|                        |                                  |                                                | Oscillatory shear → METTL3*                       | → (m <sup>6</sup> A-NLRP / YTHDF1)             | → NLRP, (+ NF-κB)                           | Chien et al. <sup>92</sup>             |
|                        |                                  |                                                |                                                   | → (m <sup>6</sup> A-KLF4 / YTHDF2)             | ⊥ KLF4                                      |                                        |
|                        |                                  |                                                | oxLDL → METTL3                                    | → (m <sup>6</sup> A-JAK2 / IGF2BP1)            | → JAK2 → p-STAT3                            | Dong et al. <sup>97</sup>              |
|                        |                                  |                                                | METTL14                                           | → (m <sup>6</sup> A-pri-miR-19a + DGCR8)       | → miR-19a                                   | Zhang et al. <sup>91</sup>             |
|                        |                                  |                                                | TNF-α → ADAR1                                     | → (edited-NEAT1 (lncRNA) / AUF1)               | → CCL2, CXL8, ICAM-1, VCAM-1                | Vlachogiannis et al. <sup>103</sup>    |
|                        |                                  | ↓                                              | Oscillatory shear ⊥ METTL3*                       | → m <sup>6</sup> A-EGFR                        | ⊥ EGFR                                      | Li et al. <sup>95</sup>                |
|                        |                                  | ↔                                              | TNF-α / INF-γ / hypoxia → ADAR1                   | → (edited-CTSS / HuR)                          | → CTSS                                      | Stellos et al. <sup>50</sup>           |
|                        | Hypertension                     | ↑                                              | Obesity → FTO                                     | ⊥ L-Pdgs                                       | → L-PDGS → PGD <sub>2</sub> → myogenic tone | Krüger et al. <sup>117</sup>           |
|                        | PH                               | ↑                                              | WTAP                                              | → m <sup>6</sup> A-Gpx4                        | → GPX4 PREPRINT                             | Wei et al. <sup>79</sup>               |
|                        |                                  |                                                | METTL3                                            | → (m <sup>6</sup> A-MAGED / YTHDF1)            | → MAGED1 → PCNA                             | Hu et al. <sup>80</sup>                |
|                        | PMD                              | ↑                                              | PM2.5 → METTL16                                   | → m <sup>6</sup> A-Sulf2                       | → SULF2                                     | Guo et al. <sup>81</sup>               |
|                        | Angiogenesis                     | ↑                                              | ADAR1                                             | → (edited-CTSS / HuR)                          | → CTSS                                      | Stellos et al. <sup>50</sup>           |
|                        |                                  |                                                | METTL3                                            | → mature let-7e-5p / miR-17-92 clusters ⊥ TSP1 | ⊥ TSP1                                      | Chamorro-Jorganes et al. <sup>56</sup> |
|                        |                                  |                                                | METTL3                                            | → (m <sup>6</sup> A-DTXL3 / IGF2BP1,-3)        | → DTXL3 → DTX1/DTXL3 heterodimer            | Wang et al. <sup>106</sup>             |
| WTAP, METTL3           |                                  |                                                | → (m <sup>6</sup> A-DSP / IGF2BP1-3)              | → DSP                                          | Wang et al. <sup>105</sup>                  |                                        |
| WTAP                   |                                  |                                                | ⊥ Wnt signaling (WT1-TBL1)                        | ⊥ β-catenin                                    | Wang et al. <sup>105</sup>                  |                                        |
| LPS + hypoxia → ALKBH5 |                                  |                                                | ⊥ m <sup>6</sup> A-SPHK1                          | ⊥ SPHK1 → p-AKT → p-eNOS                       | Kumari et al. <sup>109</sup>                |                                        |
| FTO                    |                                  |                                                | ⊥ (m <sup>6</sup> A-FAK / YTHDF2)                 | ⊥ FAK                                          | Shan et al. <sup>58</sup>                   |                                        |
|                        | ↓                                | Hypoxia → ALKBH5                               | ⊥ m <sup>6</sup> A-Wnt5a                          | → WNT5A                                        | Zhao et al. <sup>104</sup>                  |                                        |
| Aortic aneurysm        | ↑                                | METTL3                                         | → (m <sup>6</sup> A-pri-miR-34a / DGCR8)          | → miR-34a ⊥ SIRT1                              | Zhong et al. <sup>86</sup>                  |                                        |
|                        |                                  | ALKBH5                                         | ⊥ (m <sup>6</sup> A-pri-miR-143-3p / DGCR8)       | → miR-143-3p ⊥ DDX6                            | Wang et al. <sup>88</sup>                   |                                        |
|                        |                                  | FTO                                            | ⊥ m <sup>6</sup> A-Klf5                           | → KLF5                                         | Ma et al. <sup>87</sup>                     |                                        |
|                        |                                  |                                                | → GSK3β phosphorylation (inactivation)            | ⊥ KLF5                                         |                                             |                                        |
|                        |                                  | ↓                                              | KIAA1429                                          | → (m <sup>6</sup> A-pri-miR-143-3p / DGCR8)    | → miR-143-3p ⊥ DDX6                         | Wang et al. <sup>88</sup>              |

**TABLE S5. Selected summary of identified small molecules targeting m<sup>6</sup>A regulators.**

Abbreviations: *A375*, human amelanotic melanoma cell line (RRID:CVCL\_0132); *A549*, human lung adenocarcinoma cell line (RRID:CVCL\_0023); *ALKBH5*, alkB homolog 5, RNA demethylase; *AML*, acute myeloid leukemia; *ASB2*, ankyrin repeat and SOCS box containing 2; *CEBPA*, CCAAT/enhancer-binding protein alpha; *CCRF-CEM*, childhood T cell acute lymphoblastic leukemia cell line (RRID:CVCL\_0207); *FTO*, FTO alpha-ketoglutarate dependent dioxygenase; *G0*, resting phase (cell cycle), *G1*, period from mitosis to replication (cell cycle); *HeLa*, human papillomavirus-related endocervical adenocarcinoma cell line (RRID:CVCL\_0030); *HL-60*, human adult acute myeloid leukemia cell line (RRID:CVCL\_0002); *K-562*, adult chronic myeloid leukemia cell line (RRID:CVCL\_0004); *KNS81*, human glioblastoma cell line (RRID:CVCL\_2799); *LN229*, human glioblastoma cell line (RRID:CVCL\_0393); *LSCs*, leukemia stem cells; *MDA-MB-231*, human breast adenocarcinoma cell line (RRID:CVCL\_0062); *METTL3*, methyltransferase 3, N<sup>6</sup>-adenosine-methyltransferase complex catalytic subunit; *METTL14*, methyltransferase 14, N<sup>6</sup>-adenosine-methyltransferase subunit; *MIA PaCa-2*, adult human pancreatic cancer cell line (RRID:CVCL\_0428); *MOLM-13*, adult acute human myeloid cell line (RRID:CVCL\_2119); *MONOMAC6*, adult human acute monocytic leukemia cell line (RRID:CVCL\_1426); *MYC*, MYC proto-oncogene; *NB4*, childhood human acute promyelocytic leukemia cell line (RRID:CVCL\_0005); *NOMO-1*, adult human acute monocytic leukemia cell line (RRID:CVCL\_1609); *PDX-AML*, patient-derived xenograft acute myeloid leukemia; *RARA*, retinoic acid receptor alpha; *SOCS1*, suppressor of cytokine signaling 1.

**Table S5. A selection of identified compounds targeting enzymes regulating m<sup>6</sup>A**

| Compound                                                                                                                                                                           | Specific target           | Disease / Model                                                                           | Results                                                                                                                                                                                                                                        | Reference                      |
|------------------------------------------------------------------------------------------------------------------------------------------------------------------------------------|---------------------------|-------------------------------------------------------------------------------------------|------------------------------------------------------------------------------------------------------------------------------------------------------------------------------------------------------------------------------------------------|--------------------------------|
| - STM2457                                                                                                                                                                          | METTL3-14 inhibitor       | Acute myeloid leukemia                                                                    | Demethylation of leukaemogenic mRNAs inducing translational defect. Prolonged survival of various mice models of AML.                                                                                                                          | Yankova et al. <sup>1</sup>    |
| - Eltrombopag                                                                                                                                                                      | METTL3-14 inhibitor       | AML cell line (MOLM-13)                                                                   | Inhibited proliferation                                                                                                                                                                                                                        | Lee et al. <sup>2</sup>        |
| - Quercetin                                                                                                                                                                        | METTL3 inhibitor          | MIA PaCa-2 Pancreatic cancer cell line                                                    | Dose-dependently decreased of m6A and inhibited proliferation                                                                                                                                                                                  | Du et al. <sup>3</sup>         |
| - Methyl Piperidine-3-carboxylate Hydrochloride<br>- Tert-butyl 6-methylpiperidine-3-carboxylate<br>- Methyl 6-methylpiperidine-3-carboxylate<br>- Methyl Piperazine-2-carboxylate | METTL3-14-WTAP activators | HEK293 cells                                                                              | Increased (1pM, <b>1-4</b> ; 1μM; <b>2,4</b> ) and decreased (10μM, <b>1-4</b> ) RNA m <sup>6</sup> A content, increase of G0/G1 cells ( <b>1-3</b> ), increased proliferation ( <b>3-4</b> ), delayed increase in DNA synthesis ( <b>4</b> )  | Selberg et al. <sup>4</sup>    |
| - 4-amino-8-chloroquinoline-3-carboxylic acid<br>- 8-aminoquinoline-3-carboxylic acid                                                                                              | FTO inhibitors            | Midbrain mouse dopaminergic neurons                                                       | Enhanced survival during growth factor deprivation, good penetrance through blood-brain barrier                                                                                                                                                | Selberg et al. <sup>5</sup>    |
| - Meclofenamic acid (MA)                                                                                                                                                           | FTO inhibitor             | HeLa cells                                                                                | Selective FTO inhibition and increased m <sup>6</sup> A content                                                                                                                                                                                | Huang et al. <sup>6</sup>      |
| - Fluorescein derivatives                                                                                                                                                          | FTO inhibitor             |                                                                                           |                                                                                                                                                                                                                                                | Wang et al. <sup>7</sup>       |
| - FB23 (designed MA)<br>- Benzohydroxamic acid (FB23-2)                                                                                                                            | FTO inhibitors            | NB4 + MONOMAC6 cells<br><br>Mice (xeno-MONOMAC6)<br>Mice (PDX AML)                        | Weak effect on proliferation (low cellular uptake)<br>Anti-proliferative, prodifferentiative, proapoptotic, m6A increase<br>Suppressed leukemia progression and enhanced survival<br>Prolonged latency and survival, elimination of LSCs       | Huang et al. <sup>8</sup>      |
| - Rhein<br>- FB23-2                                                                                                                                                                | FTO inhibitors            | Human obesity and hypertensive arteries                                                   | Increased myogenic tonus                                                                                                                                                                                                                       | Kruger et al. <sup>9</sup>     |
| - 18077<br>- 18097                                                                                                                                                                 | FTO inhibitors            | Cancer cell lines (HeLa, MDA-MB-231, A549, A375)<br>Mice (xeno-MDA-MB-231)                | Increase m6A and FTO stability, chemosensitivity, suppress proliferation, lipogenesis and invasive properties involving SOCS1<br>Smaller tumor volumes, reduced pulmonary colonization                                                         | Xie et al. <sup>10</sup>       |
| - CS1 (Hydrophobic with micelles / β-cyclodextrin)<br>- CS2                                                                                                                        | FTO inhibitors            | AML cell lines (multiple)<br>Mice (Leukemia stem cells)<br>NOMO-1 cells<br>Mice (PDX AML) | Reduced viability, increased apoptosis, differentiation, m6A level<br>Decreased levels, inhibited repopulation capacity<br>Decreased MYC + CEBPA, increased RARA + ASB2 translation<br>Prolonged survival, reduced infiltration (above FB23-2) | Su et al. <sup>11</sup>        |
| - FTO-4                                                                                                                                                                            | FTO inhibitor             | Patient-derived glioblastoma stem cells                                                   | Prevented neurosphere formation while no effect on neurosphere formation of healthy stem cells                                                                                                                                                 | Huff et al. <sup>12</sup>      |
| - 2-[(1-hydroxy-2-oxo-2-phenylethyl)sulfonyl]acetic acid<br>- 4-[[[(furan-2-yl)methyl]amino]-1,2-diazinane-3,6-dione                                                               | ALKBH5 inhibitors         | Leukemia cells (HL-60, CCRF-CEM, K562)                                                    | Inhibited cell proliferation                                                                                                                                                                                                                   | Selberg et al. <sup>13</sup>   |
| - Ena15<br>- Ena21                                                                                                                                                                 | ALKBH5 inhibitors         | Human glioblastoma multiforme cell lines KNS81 and LN229                                  | Inhibited growth activity                                                                                                                                                                                                                      | Takahashi et al. <sup>14</sup> |

A review discussing both FTO and ALKBH5 inhibitors identified by 22.5.2022: You et al.<sup>15</sup>

## Supplemental references

1. Yankova, E., Blackaby, W., Albertella, M., Rak, J., De Braekeleer, E., Tsagkogeorga, G., Pilka, E.S., Aspris, D., Leggate, D., Hendrick, A.G., et al. (2021). Small-molecule inhibition of METTL3 as a strategy against myeloid leukaemia. *Nature* 593, 597-601. 10.1038/s41586-021-03536-w.
2. Lee, J.H., Choi, N., Kim, S., Jin, M.S., Shen, H., and Kim, Y.C. (2022). Eltrombopag as an Allosteric Inhibitor of the METTL3-14 Complex Affecting the m(6)A Methylation of RNA in Acute Myeloid Leukemia Cells. *Pharmaceuticals (Basel)* 15. 10.3390/ph15040440.
3. Du, Y., Yuan, Y., Xu, L., Zhao, F., Wang, W., Xu, Y., and Tian, X. (2022). Discovery of METTL3 Small Molecule Inhibitors by Virtual Screening of Natural Products. *Front Pharmacol* 13, 878135. 10.3389/fphar.2022.878135.
4. Selberg, S., Blokhina, D., Aatonen, M., Koivisto, P., Siltanen, A., Mervaala, E., Kankuri, E., and Karelson, M. (2019). Discovery of Small Molecules that Activate RNA Methylation through Cooperative Binding to the METTL3-14-WTAP Complex Active Site. *Cell Rep* 26, 3762-3771 e3765. 10.1016/j.celrep.2019.02.100.
5. Selberg, S., Yu, L.Y., Bondarenko, O., Kankuri, E., Seli, N., Kovaleva, V., Herodes, K., Saarma, M., and Karelson, M. (2021). Small-Molecule Inhibitors of the RNA M6A Demethylases FTO Potently Support the Survival of Dopamine Neurons. *Int J Mol Sci* 22. 10.3390/ijms22094537.
6. Huang, Y., Yan, J., Li, Q., Li, J., Gong, S., Zhou, H., Gan, J., Jiang, H., Jia, G.F., Luo, C., et al. (2015). Meclofenamic acid selectively inhibits FTO demethylation of m6A over ALKBH5. *Nucleic Acids Res* 43, 373-384. 10.1093/nar/gku1276.
7. Wang, T., Hong, T., Huang, Y., Su, H., Wu, F., Chen, Y., Wei, L., Huang, W., Hua, X., Xia, Y., et al. (2015). Fluorescein Derivatives as Bifunctional Molecules for the Simultaneous Inhibiting and Labeling of FTO Protein. *J Am Chem Soc* 137, 13736-13739. 10.1021/jacs.5b06690.
8. Huang, Y., Su, R., Sheng, Y., Dong, L., Dong, Z., Xu, H., Ni, T., Zhang, Z.S., Zhang, T., Li, C., et al. (2019). Small-Molecule Targeting of Oncogenic FTO Demethylase in Acute Myeloid Leukemia. *Cancer Cell* 35, 677-691 e610. 10.1016/j.ccell.2019.03.006.
9. Kruger, N., Biwer, L.A., Good, M.E., Ruddiman, C.A., Wolpe, A.G., DeLalio, L.J., Murphy, S., Macal, E.H., Jr., Ragolia, L., Serbulea, V., et al. (2020). Loss of Endothelial FTO Antagonizes Obesity-Induced Metabolic and Vascular Dysfunction. *Circ Res* 126, 232-242. 10.1161/CIRCRESAHA.119.315531.
10. Xie, G., Wu, X.N., Ling, Y., Rui, Y., Wu, D., Zhou, J., Li, J., Lin, S., Peng, Q., Li, Z., et al. (2022). A novel inhibitor of N (6)-methyladenosine demethylase FTO induces mRNA methylation and shows anti-cancer activities. *Acta Pharm Sin B* 12, 853-866. 10.1016/j.apsb.2021.08.028.
11. Su, R., Dong, L., Li, Y., Gao, M., Han, L., Wunderlich, M., Deng, X., Li, H., Huang, Y., Gao, L., et al. (2020). Targeting FTO Suppresses Cancer Stem Cell Maintenance and Immune Evasion. *Cancer Cell* 38, 79-96 e11. 10.1016/j.ccell.2020.04.017.
12. Huff, S., Tiwari, S.K., Gonzalez, G.M., Wang, Y., and Rana, T.M. (2021). m(6)A-RNA Demethylase FTO Inhibitors Impair Self-Renewal in Glioblastoma Stem Cells. *ACS Chem Biol* 16, 324-333. 10.1021/acchembio.0c00841.
13. Selberg, S., Seli, N., Kankuri, E., and Karelson, M. (2021). Rational Design of Novel Anticancer Small-Molecule RNA m6A Demethylase ALKBH5 Inhibitors. *ACS Omega* 6, 13310-13320. 10.1021/acsomega.1c01289.
14. Takahashi, H., Hase, H., Yoshida, T., Tashiro, J., Hirade, Y., Kitae, K., and Tsujikawa, K. (2022). Discovery of two novel ALKBH5 selective inhibitors that exhibit uncompetitive or competitive type and suppress the growth activity of glioblastoma multiforme. *Chem Biol Drug Des.* 10.1111/cbdd.14051.
15. You, Y., Fu, Y., Huang, M., Shen, D., Zhao, B., Liu, H., Zheng, Y., and Huang, L. (2022). Recent Advances of m6A Demethylases Inhibitors and Their Biological Functions in Human Diseases. *Int J Mol Sci.* 23, 5815. 10.3390/ijms2310581
